# Supplementary material for: Implementing a national non-communicable disease policy in sub-Saharan Africa: Experiences of key stakeholders in Ghana
Source: PubMed Central journal article supplement — Health Policy Open. 2020 Jul 27;1:100009. doi: 10.1016/j.hpopen.2020.100009 (PMC10297756; doi:10.1016/j.hpopen.2020.100009), 2020-07-27
Supplement: mmc1.pdf [file mmc1.pdf]

**COREQ (Consolidated criteria for Reporting Qualitative research) Checklist**

A checklist of items that should be included in reports of qualitative research. You must report the page number in your manuscript where you consider each of the items listed in this checklist. If you have not included this information, either revise your manuscript accordingly before submitting or note N/A.

| Item No.                                       | Topic                                    | Guide Questions/Description                                                                                                                                                          | Reported on Page No.            |
|------------------------------------------------|------------------------------------------|--------------------------------------------------------------------------------------------------------------------------------------------------------------------------------------|---------------------------------|
| <b>Domain 1: RESEARCH TEAM AND REFLEXIVITY</b> |                                          |                                                                                                                                                                                      |                                 |
| Personal characteristics                       |                                          |                                                                                                                                                                                      |                                 |
| 1                                              | Interviewer/facilitator                  | GNN conducted all interviews                                                                                                                                                         | See Figure 2_ Study methodology |
| 2                                              | Credentials                              | GNN(PhD Fellow), KS (PhD), LM (PhD), CLK (PhD), CA (PhD)                                                                                                                             | Authors contributions.          |
| 3                                              | Occupation                               | GNN (PhD Fellow), KS (Professor of Social Medicine), LM (PhD Medical Anthropologist, Researcher), CLK (PhD, Anthropologist), CA (Professor of Global Migration, Ethnicity & Health.) | Authors contributions.          |
| 4                                              | Gender                                   | Four researchers are females and one male researcher                                                                                                                                 | Authors contributions.          |
| 5                                              | Experience and training                  | All authors have extensive experience conducting qualitative research studies.                                                                                                       | Authors contributions.          |
| Relationship with participants                 |                                          |                                                                                                                                                                                      |                                 |
| 6                                              | Relationship established                 | No                                                                                                                                                                                   | See Figure 2_ Study methodology |
| 7                                              | Participant knowledge of the interviewer | No                                                                                                                                                                                   |                                 |
| 8                                              | Interviewer characteristics              | Yes                                                                                                                                                                                  | See Figure 2_ Study methodology |

NYAABA ET.AL- IMPLEMENTING A NATIONAL NON-COMMUNICABLE DISEASE POLICY IN SUB-SAHARAN AFRICA: EXPERIENCES OF KEY STAKEHOLDERS IN GHANA

| DOMAIN 2: STUDY DESIGN |                                       |                                                                                                                                                      |                                        |
|------------------------|---------------------------------------|------------------------------------------------------------------------------------------------------------------------------------------------------|----------------------------------------|
| Theoretical framework  |                                       |                                                                                                                                                      |                                        |
| 9                      | Methodological orientation and Theory | Thematic approach and elements of grounded theory                                                                                                    | Page 3 and Figure 2_ Study methodology |
| Participant selection  |                                       |                                                                                                                                                      |                                        |
| 10                     | Sampling                              | Purposive                                                                                                                                            | Page 3 and Figure 2_ Study methodology |
| 11                     | Method of approach                    | Formal letters were submitted to the relevant institutions outlining the purpose of the research and inviting pre-identified officers for interviews | See Figure 2_ Study methodology        |
| 12                     | Sample size                           | 39                                                                                                                                                   | Page 3                                 |
| 13                     | Non-participation                     | Three Health officers at the regional level were unavailable                                                                                         | See Figure 2_ Study methodology        |
| Setting                |                                       |                                                                                                                                                      |                                        |
| 14                     | Setting of data collection            | Interviews were conducted in participants' offices.                                                                                                  | See Figure 2_ Study methodology        |
| 15                     | Presence of non-participants          | No                                                                                                                                                   |                                        |
| 16                     | Description of sample                 | This is provided in Table 1. Characteristics of interview participants                                                                               | Page 3                                 |
| Data collection        |                                       |                                                                                                                                                      |                                        |
| 17                     | Interview guide                       | We used an interview guide to guide the discussion                                                                                                   | Page 3                                 |
| 18                     | Repeat interviews                     | No                                                                                                                                                   | See Figure 2_ Study methodology        |

NYAABA ET.AL- IMPLEMENTING A NATIONAL NON-COMMUNICABLE DISEASE POLICY IN SUB-SAHARAN AFRICA: EXPERIENCES OF KEY STAKEHOLDERS IN GHANA

|                                        |                                |                                                      |                                 |
|----------------------------------------|--------------------------------|------------------------------------------------------|---------------------------------|
| 19                                     | Audio/visual recording         | All interviews were digitally recorded               | See Figure 2_ Study methodology |
| 20                                     | Field notes                    | No                                                   | NA                              |
| 21                                     | Duration                       | 30 to 65 minutes per interview                       | See Figure 2_ Study methodology |
| 22                                     | Data saturation                | Yes                                                  | Page 3                          |
| 23                                     | Transcripts returned           | No                                                   | See Figure 2_ Study methodology |
| <b>DOMAIN 3: ANALYSIS AND FINDINGS</b> |                                |                                                      |                                 |
| Data analysis                          |                                |                                                      |                                 |
| 24                                     | Number of data coders          | 1                                                    | See Figure 2_ Study methodology |
| 25                                     | Description of the coding tree | Yes                                                  | See Figure 2_ Study methodology |
| 26                                     | Derivation of themes           | Themes were pre-identified and evolved from the data | See Figure 2_ Study methodology |
| 27                                     | Software                       | Nvivo version 11.0 Pro                               | Page 3                          |
| 28                                     | Participant checking           | No                                                   | NA                              |
| Reporting                              |                                |                                                      |                                 |
| 29                                     | Quotations presented           | Yes                                                  | 3-8, Supplementary file 2       |
| 30                                     | Data and findings consistent   | Yes                                                  | 8-11                            |
| 31                                     | Clarity of major themes        | Yes                                                  | 3                               |

NYAABA ET.AL- IMPLEMENTING A NATIONAL NON-COMMUNICABLE DISEASE POLICY IN SUB-SAHARAN AFRICA: EXPERIENCES OF KEY STAKEHOLDERS IN GHANA

|    |                         |     |     |
|----|-------------------------|-----|-----|
| 32 | Clarity of minor themes | Yes | 3-8 |
|----|-------------------------|-----|-----|
